# Supplementary material for: microRNA-214 promotes epithelial-mesenchymal transition and metastasis in lung adenocarcinoma by targeting the suppressor-of-fused protein (Sufu)
Source: PubMed Central journal article supplement (PMC4770731; doi:10.18632/oncotarget.5478), 2015-10-08
Supplement: oncotarget-06-38705-s001.pdf [file oncotarget-06-38705-s001.pdf]

## SUPPLEMENTARY FIGURES AND TABLES

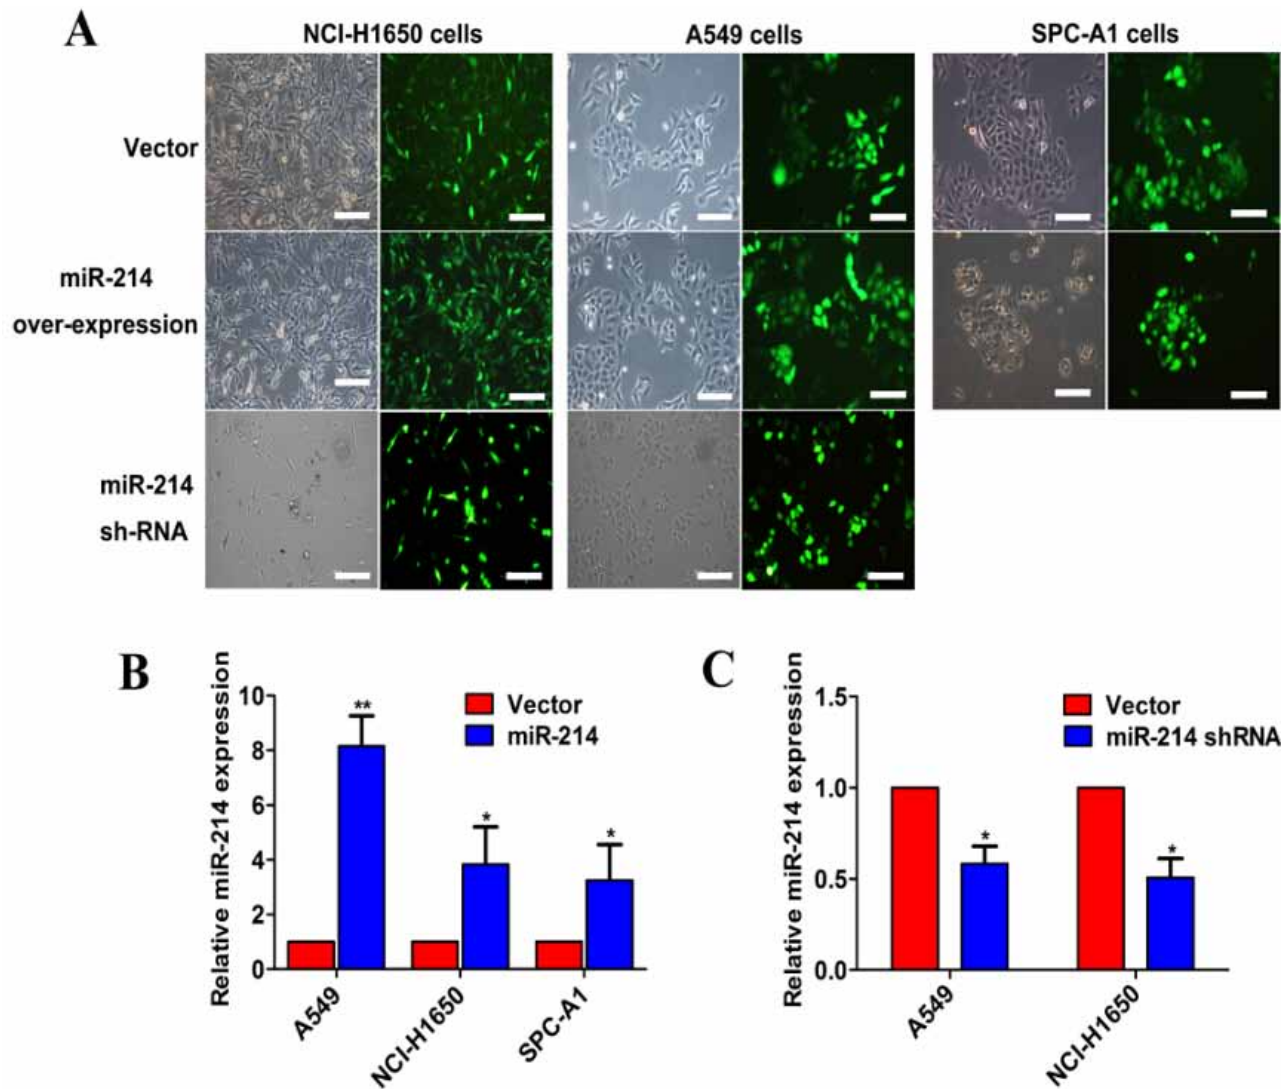

**Supplementary Figure S1:** A. A morphological image of A549, NCI-H1650 and SPC-A1 cells transfected with miR-214-overexpression, inhibitor or empty lentiviral vectors. B–C. miR-214 expression levels as tested by qRT-PCR in the indicated cells following transfection with the above-mentioned virus. All experiments were performed at least three times, and the data are expressed as means  $\pm$  SD. The statistical significance of differences was measured by unpaired student's *t*-test. \* $P < 0.05$ , \*\* $P < 0.01$ .

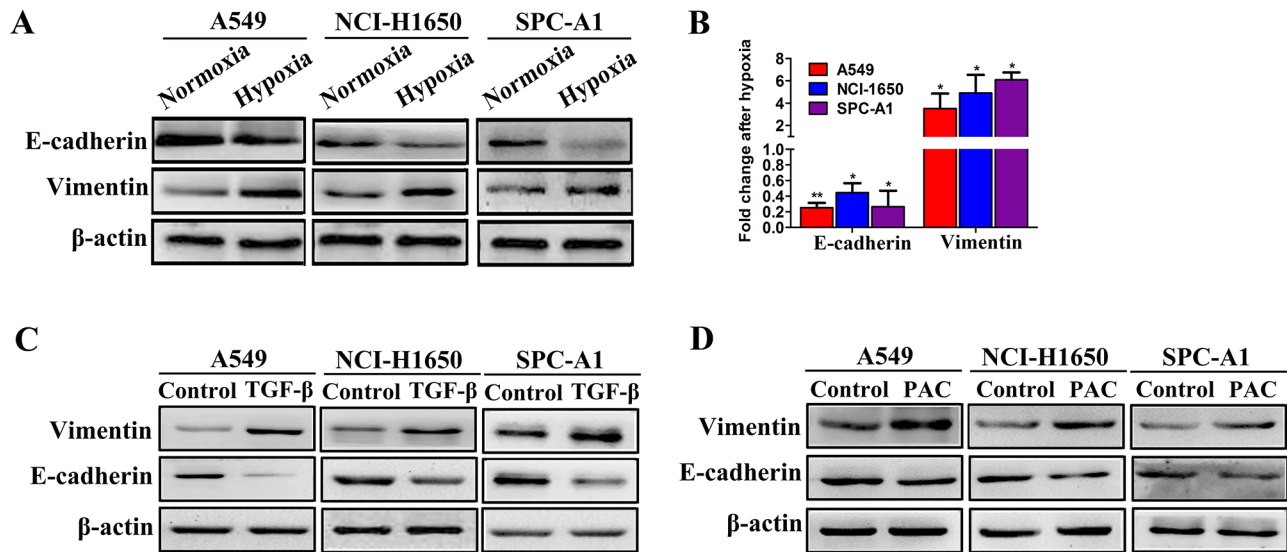

**Supplementary Figure S2:** A–B The expression of E-cadherin and vimentin under normoxia (21% O<sub>2</sub>) or hypoxia (0.5% O<sub>2</sub>) treatment for 24 hours in three LCCs (A549, NCI-H1650, and SPC-A1), as determined by western blots and real-time PCR. C. The TGF-β (5 ng/ml) treatment was performed for 7 days, and the EMT markers were analyzed by western blotting. D. The expressions of E-cadherin and vimentin were detected by western blotting under paclitaxel (5 ng/ml) treatment for 2 days. All experiments were performed three times and the data are expressed as means ± SD. The statistical significance of differences was measured by unpaired student's *t*-test. \**P* < 0.05, \*\**P* < 0.01.

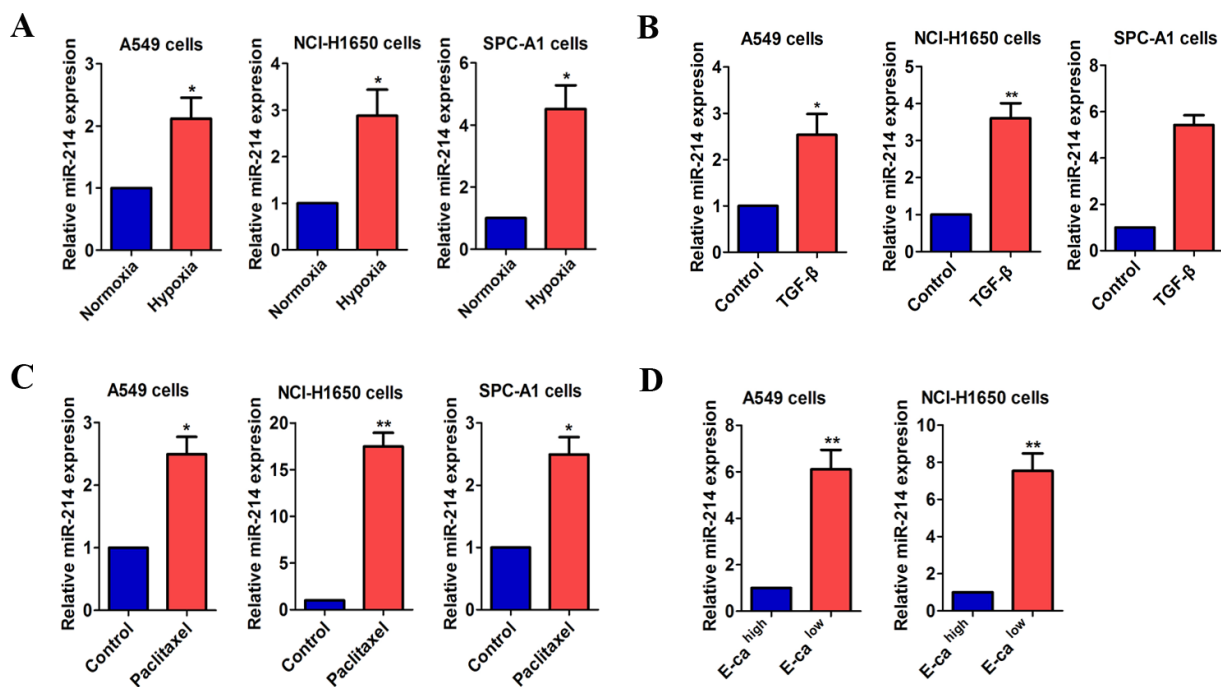

**Supplementary Figure S3:** A. Fold changes in miR-214 were detected by real-time PCR in three LCCs (A549, NCI-H1650, and SPC-A1) under normoxia (21% O<sub>2</sub>) or hypoxia (0.5% O<sub>2</sub>) treatment for 24 hours. B. miR-214 expression in three LCCs under TGF-β (5 ng/ml) treatment for 7 days. C. miR-214 expression in LCCs under paclitaxel (5 ng/ml) treatment for 2 days. D. Low E-cadherin-expressing cells (marked as E-ca<sup>low</sup>) and high expression cells (marked as E-ca<sup>high</sup>) were sorted by flow cytometry from A549 or NCI-H1650 cells under hypoxia treatment. The fold changes of miR-214 were detected by qRT-PCR. All experiments were performed three times, and the data are expressed as means ± SD. The statistical significance of differences was measured by unpaired student's *t*-test. \**P* < 0.05, \*\**P* < 0.01.

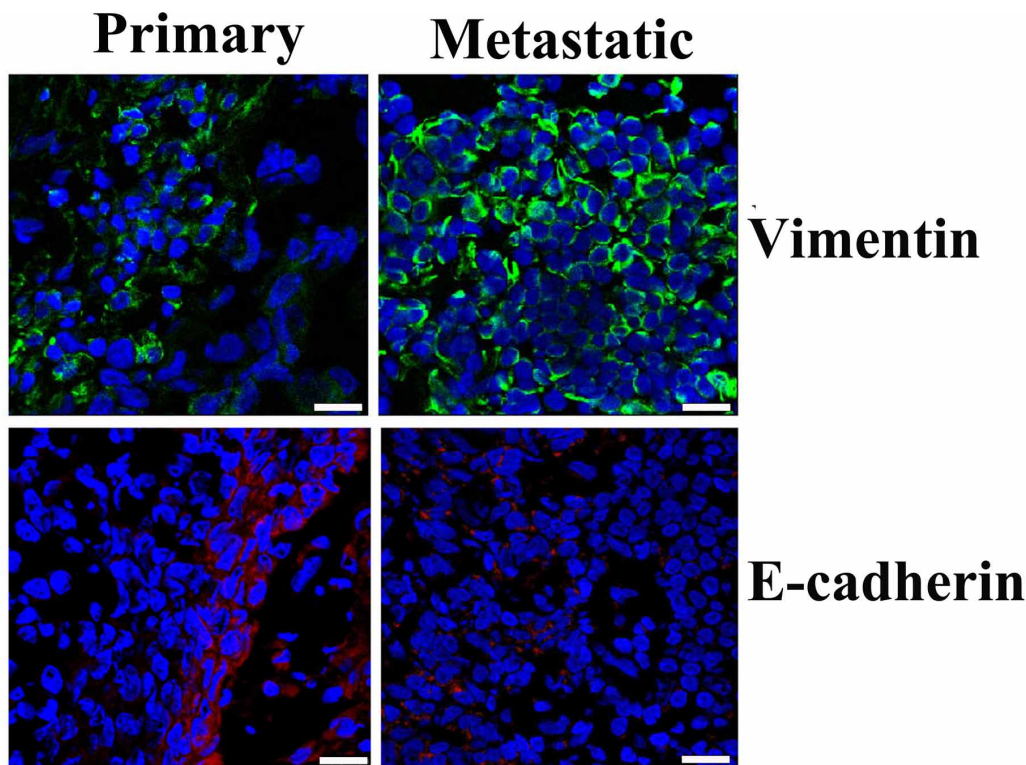

**Supplementary Figure S4:** Microscopic images showing E-cadherin and vimentin protein levels in primary and metastatic lung tumor pairs ( $n = 10$  paired). The nuclei were staining with DAPI. The statistical significance of differences was measured by unpaired student's  $t$ -test. Scale bar = 25  $\mu$ m.

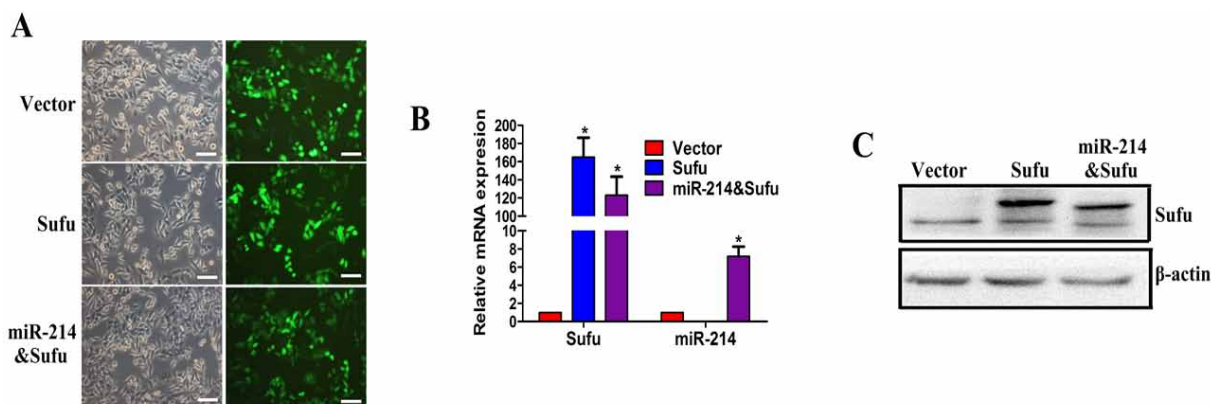

**Supplementary Figure S5:** **A.** A morphological image of A549 cells transfected with Sufu-overexpression or both miR-214&Sufu-overexpression or empty lentiviral vectors. Scale bar = 25  $\mu$ m. **B.** Sufu gene expression levels as tested by qRT-PCR in A549 cells transfected with Sufu or miR-214&Sufu-overexpression virus or the miR-214 expression levels in miR-214&Sufu-overexpression cells. **C.** Sufu protein expression levels was tested by western blot in A549 cells transfected with Sufu-overexpression or miR-214&Sufu-overexpression virus. All experiments were performed three times, and the data are expressed as means  $\pm$  SD. The statistical significance of differences was measured by unpaired student's  $t$ -test. \* $P < 0.05$ , \*\* $P < 0.01$ .

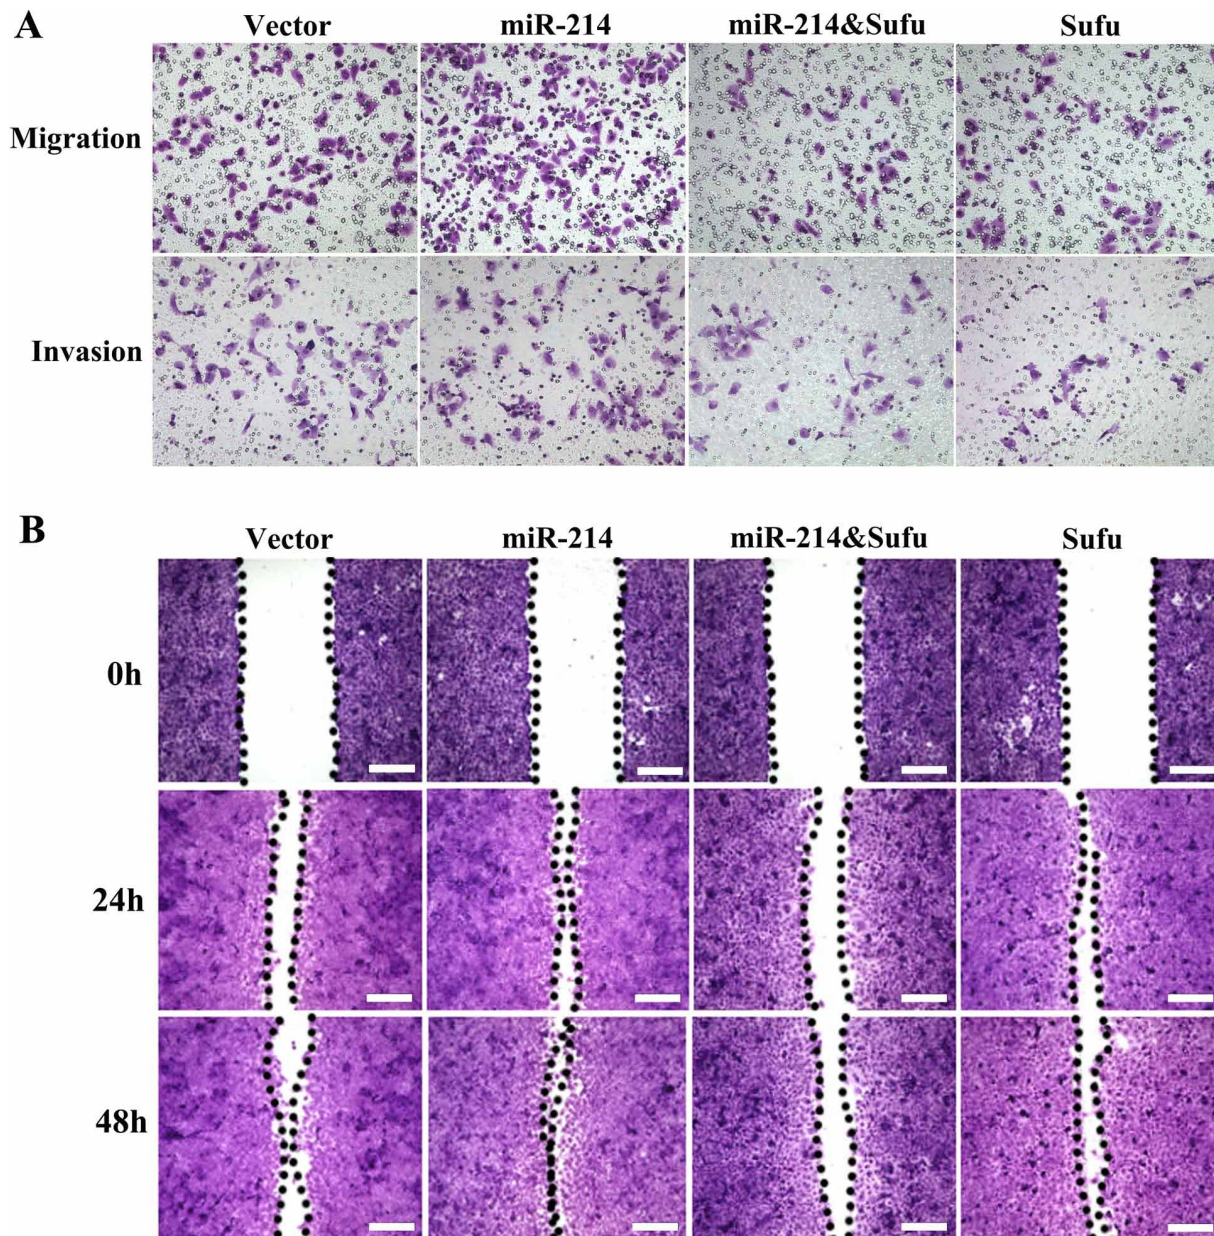

**Supplementary Figure S6:** A. A morphological image of the invasive and migration capacities of miR-214-over-expressed and/or SUFU-over-expressed A549 cells as assessed by Transwell migration assay and Matrigel invasion assay. B. Wound-healing assay images of miR-214-over-expressed and/or SUFU-over-expressed A549 cells at 0, 24, and 48 hours. Scale bar = 25  $\mu$ m.

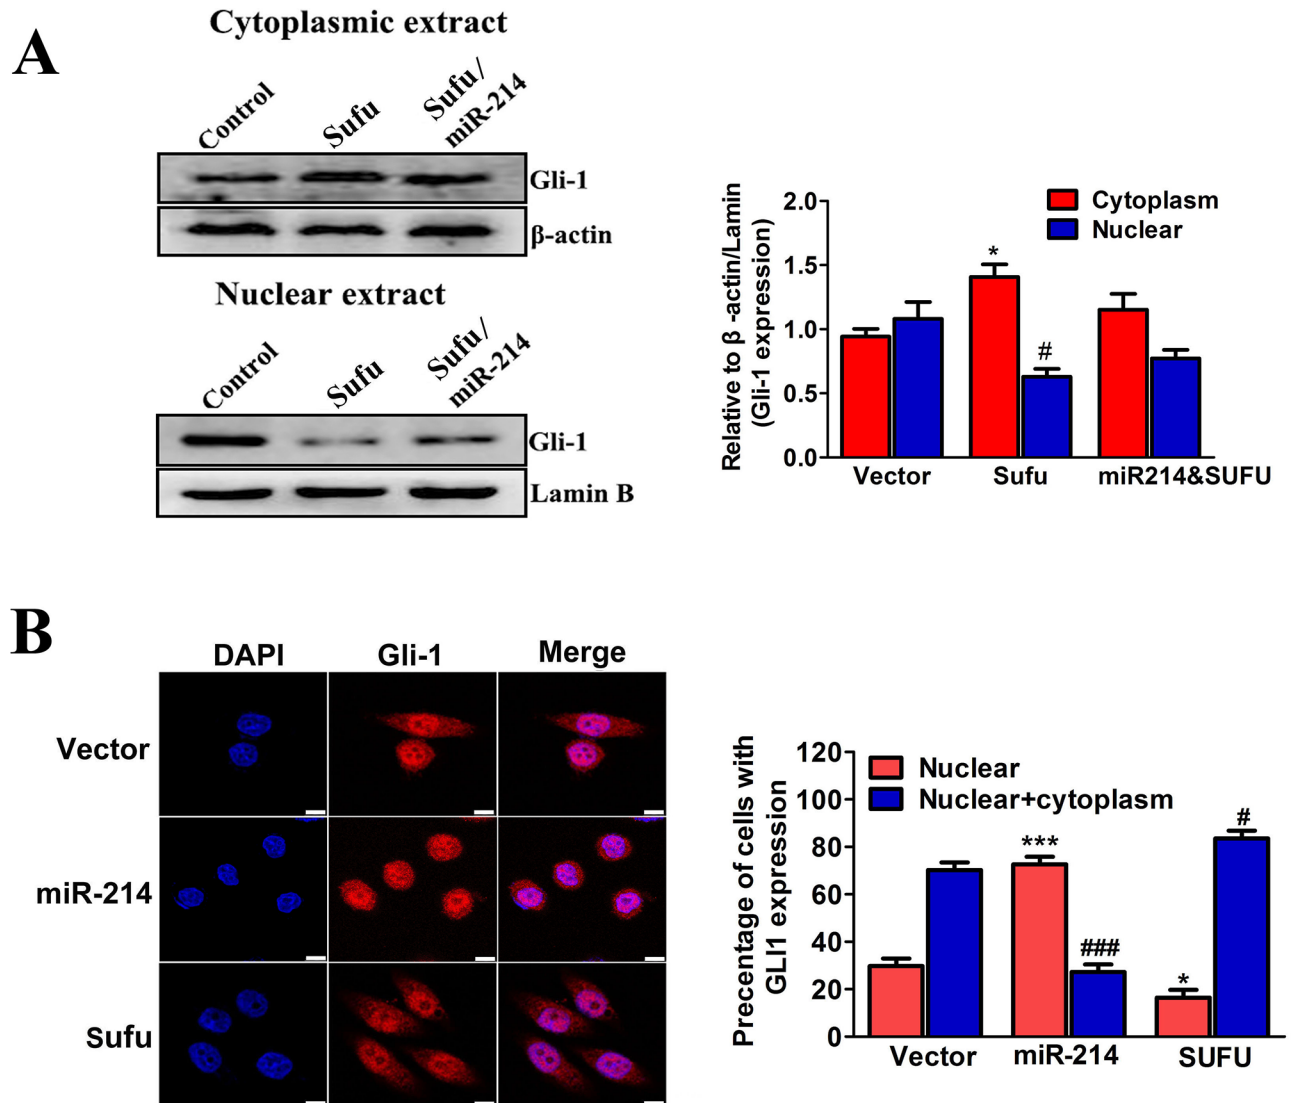

**Supplementary Figure S7: A.** A western blot analysis of Gli-1 levels in cytoplasmic extract and nuclear extract in the indicated cells. **B.** An immunofluorescence analysis of the Gli-1 nuclear translocation in miR-214-over-expression or Sufu-over-expression A549 cells. Scale bar = 5.0 μm. All experiments were performed three times, and the data are expressed as means ± SD. The statistical significance of differences was measured by unpaired student's *t*-test. \**P* for nuclear extract group, \**P* < 0.05, \*\**P* < 0.01, \*\*\**P* < 0.001, #*P* for nuclear extract group. #*P* < 0.05, ###*P* < 0.001.

Supplementary Table S1: Information about the LAC patients

| Information about the lung cancer tissues |            |     |     |                        |           |               |
|-------------------------------------------|------------|-----|-----|------------------------|-----------|---------------|
| ID                                        | Metastasis | Sex | Age | Tumor size<br>mm*mm*mm | Histology | Disease grade |
| 02210660                                  | No         | M   | 44  | 25*20*16               | Adeno     | Ia            |
| 02745462                                  | No         | M   | 68  | 30*27*16               | Adeno     | Ia            |
| 01492676                                  | No         | F   | 53  | 25*24*15               | Adeno     | Ia            |
| 02831476                                  | No         | M   | 53  | 22*20*16               | Adeno     | Ia            |
| 02303857                                  | No         | F   | 38  | 20*15*10               | Adeno     | Ia            |
| 00119957                                  | No         | F   | 76  | 28*27*18               | Adeno     | Ia            |
| 00040714                                  | No         | F   | 54  | 24*23*15               | Adeno     | Ia            |
| 01938410                                  | No         | M   | 69  | 30*25*17               | Adeno     | Ia            |
| 01892459                                  | No         | M   | 71  | 25*24*15               | Adeno     | Ia            |
| 01664226                                  | No         | M   | 75  | 30*24*15               | Adeno     | Ia            |
| 02210258                                  | No         | M   | 54  | 25*24*15               | Adeno     | Ia            |
| 03975599                                  | No         | F   | 52  | 23*20*14               | Adeno     | Ia            |
| 03952421                                  | No         | M   | 46  | 45*40*30               | Adeno     | Ib            |
| 04163192                                  | No         | M   | 46  | 30*25*15               | Adeno     | Ib            |
| 03457132                                  | No         | M   | 66  | 50*45*45               | Adeno     | Ib            |
| 04176656                                  | No         | F   | 65  | 60*40*30               | Adeno     | Ib            |
| 04127588                                  | No         | M   | 56  | 25*24*18               | Adeno     | Ib            |
| 04093251                                  | No         | F   | 54  | 30*25*20               | Adeno     | Ibx           |
| 04157797                                  | Yes        | M   | 54  | 50*45*40               | Adeno     | II            |
| 102017305                                 | Yes        | M   | 61  | 45*25*15               | Adeno     | IIa           |
| 04059539                                  | Yes        | M   | 64  | 40*35*35               | Adeno     | IIa           |
| 04175374                                  | Yes        | M   | 63  | 40*30*18               | Adeno     | IIa           |
| 03945988                                  | Yes        | F   | 43  | 18*12*7                | Adeno     | IIb           |
| 03973858                                  | No         | M   | 64  | 50*30*15               | Adeno     | IIb           |
| 03996058                                  | Yes        | M   | 55  | 50*50*40               | Adeno     | IIb           |
| 04096772                                  | No         | M   | 61  | 45*40*30               | Adeno     | IIb           |
| 04176036                                  | No         | M   | 44  | 85*75*40               | Adeno     | IIb           |
| 03419020                                  | No         | F   | 60  | 35*34*25               | Adeno     | IIb           |
| 03977769                                  | Yes        | M   | 45  | 55*50*35               | Adeno     | IIIa          |
| 04034458                                  | Yes        | M   | 50  | 45*30*30               | Adeno     | IIIa          |
| 04176041                                  | Yes        | M   | 64  | 20*20*15               | Adeno     | IIIa          |
| 04196680                                  | No         | F   | 58  | 70*60*56               | Adeno     | IIIa          |
| 04095714                                  | No         | F   | 50  | 60*55*45               | Adeno     | IIIa          |

(Continued)

| ID        | Metastasis | Sex | Age | Tumor size<br>mm*mm*mm | Histology | Disease grade |
|-----------|------------|-----|-----|------------------------|-----------|---------------|
| 200220265 | Yes        | F   | 45  | 65*55*50               | Adeno     | IIIa          |
| 03985952  | Yes        | M   | 55  | 65*60*55               | Adeno     | IV            |
| 04096256  | Yes        | M   | 65  | 45*35*30               | Adeno     | IV            |

**Information about the paracancerous tissues**

|          |     |   |    |          |       |      |
|----------|-----|---|----|----------|-------|------|
| 02210660 | No  | M | 44 | 25*20*16 | Adeno | Ia   |
| 02745462 | No  | M | 68 | 30*27*16 | Adeno | Ia   |
| 01492676 | No  | F | 53 | 25*24*15 | Adeno | Ia   |
| 02831476 | No  | M | 53 | 22*20*16 | Adeno | Ia   |
| 03975599 | No  | F | 52 | 23*20*14 | Adeno | Ia   |
| 03952421 | No  | M | 46 | 45*40*30 | Adeno | Ib   |
| 00137813 | No  | F | 52 | 30*25*20 | Adeno | Ib   |
| 03945988 | Yes | F | 43 | 18*12*7  | Adeno | IIb  |
| 03973858 | No  | M | 64 | 50*30*15 | Adeno | IIb  |
| 03996058 | Yes | M | 55 | 50*50*40 | Adeno | IIb  |
| 03977769 | Yes | M | 45 | 55*50*35 | Adeno | IIIa |
| 04034458 | Yes | M | 50 | 45*30*30 | Adeno | IIIa |
| 02114062 | Yes | F | 66 | 65*55*45 | Adeno | IV   |

**Information about the primary and metastatic tissues**

|          |     |   |    |          |       |      |
|----------|-----|---|----|----------|-------|------|
| 2484507  | Yes | M | 66 | 20*15*15 | Adeno | IIa  |
| 2640196  | Yes | M | 55 | 40*40*30 | Adeno | IIb  |
| 1170635  | Yes | M | 60 | 40*40*50 | Adeno | IIb  |
| 04176041 | Yes | M | 64 | 20*20*15 | Adeno | IIIa |
| 1156491  | Yes | M | 63 | 40*40*30 | Adeno | IIIa |
| 2390076  | Yes | F | 65 | 45*40*40 | Adeno | IIIa |
| 1117573  | Yes | F | 55 | 40*30*20 | Adeno | IIIb |
| 2237362  | Yes | F | 59 | 38*35*32 | Adeno | IV   |

F: female; M: male; and Adeno: lung adenocarcinoma.

**Supplementary Table S2: Primers for selected genes**

| Gene name      | Primers                     |                             | Product bp |
|----------------|-----------------------------|-----------------------------|------------|
|                | Sense                       | Antisense                   |            |
| E-cadherin     | GTCTGTCATGGAAGGTGCT         | TACGACGTTAGCCTCGTTC         | 320        |
| Vimentin       | CCACGAAGAGGAAATCCAGG        | CAGAGAGGTCAGCAAACCTTGG      | 188        |
| Snail          | GAGGCGGTGGCAGACTAG          | GACACATCGGTTCAGACCAG        | 159        |
| MMP-9          | GGCATCCGGCACCTCTATGGTCC     | GCCACTTGTCGGCGATAAGGAAGG    | 256        |
| Oct-4          | AAGCTGCTGAAACAGAAGAGG       | ACACGGTTCTCAATGCTAGTC       | 210        |
| CD326          | ATCGTCAATGCCAGTGTA          | CTCGCTCAGAGCAGGTTA          | 288        |
| Nanog          | CAGCTGTGTGTACTCAATGATAGATTT | CAACTGGCCGAAGAATAGCAATGGTGT | 142        |
| Sufu           | CTCCTGACTTGTAACAGGGACC      | AGTTGCAAGCAGGGAGAAAA        | 155        |
| Twist          | CGGGAGTCCGCAGTCTTA          | GCTTGAGGGTCTGAATCTTG        | 161        |
| $\beta$ -actin | TGGAGAAGAGCTATGAGCTGCCTG    | GTGCCACCAGACAGCACTGTGTTG    | 201        |
